# Supplementary material for: Beyond sodefrin: evidence for a multi-component pheromone system in the model newt Cynops pyrrhogaster (Salamandridae)
Source: PubMed Central journal article supplement (PMC4776240; doi:10.1038/srep21880), 2016-03-03
Supplement: srep21880-s1.pdf [file srep21880-s1.pdf]

# Supplementary information

## **Beyond sodefrin: evidence for a multi-component pheromone system in the model newt *Cynops pyrrhogaster* (Salamandridae)**

Ines Van Bocxlaer<sup>1</sup>, Margo Maex<sup>1</sup>, Dag Treer<sup>1</sup>, Sunita Janssenswillen<sup>1</sup>, Rik Janssens<sup>2</sup>, Wim Vandebergh<sup>1</sup>, Paul Proost<sup>2</sup> and Franky Bossuyt<sup>1</sup>

1 Amphibian Evolution Lab, Biology Department, Vrije Universiteit Brussel (VUB), Pleinlaan 2, B-1050 Brussels, Belgium

2 Laboratory of Molecular Immunology, Department of Microbiology and Immunology, Laboratory of Molecular Immunology, KU Leuven - University of Leuven, Minderbroedersstraat 10 - box 1030, B-3000 Leuven, Belgium

Contains:

Movie S1: Courtship display in *Cynops pyrrhogaster*.

Figure S1: RP-HPLC elution profile of non-courting male female water.

Figure S2: Maximum Likelihood tree of SPF precursors.

Table S1: Primers used in this study.

Table S2: Edman sequences of proteins in courtship water.

Table S3: Estimated expression of SPF precursors in the dorsal gland of *L. helveticus*

Table S4: Accession numbers of species used in the phylogenetic analyses.

**Movie S1: Courtship display in *Cynops pyrrhogaster*.**

<http://dx.doi.org/10.6084/m9.figshare.1619847>

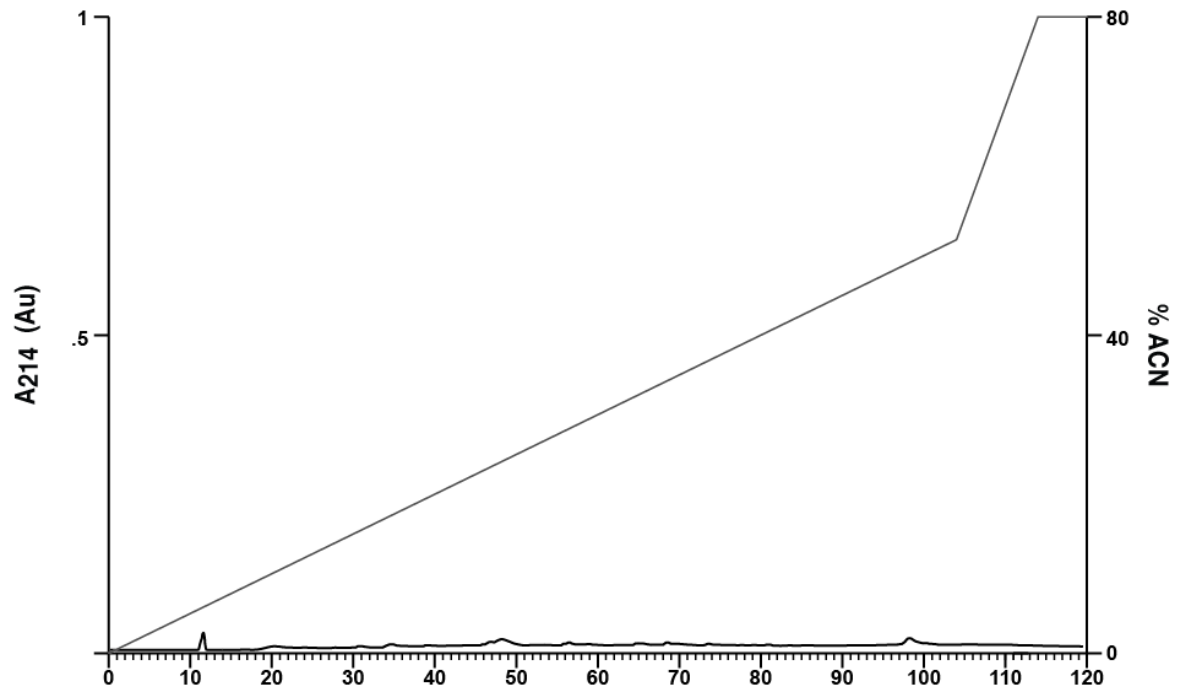

**Figure S2: RP-HPLC elution profile of non-courting male female water.**

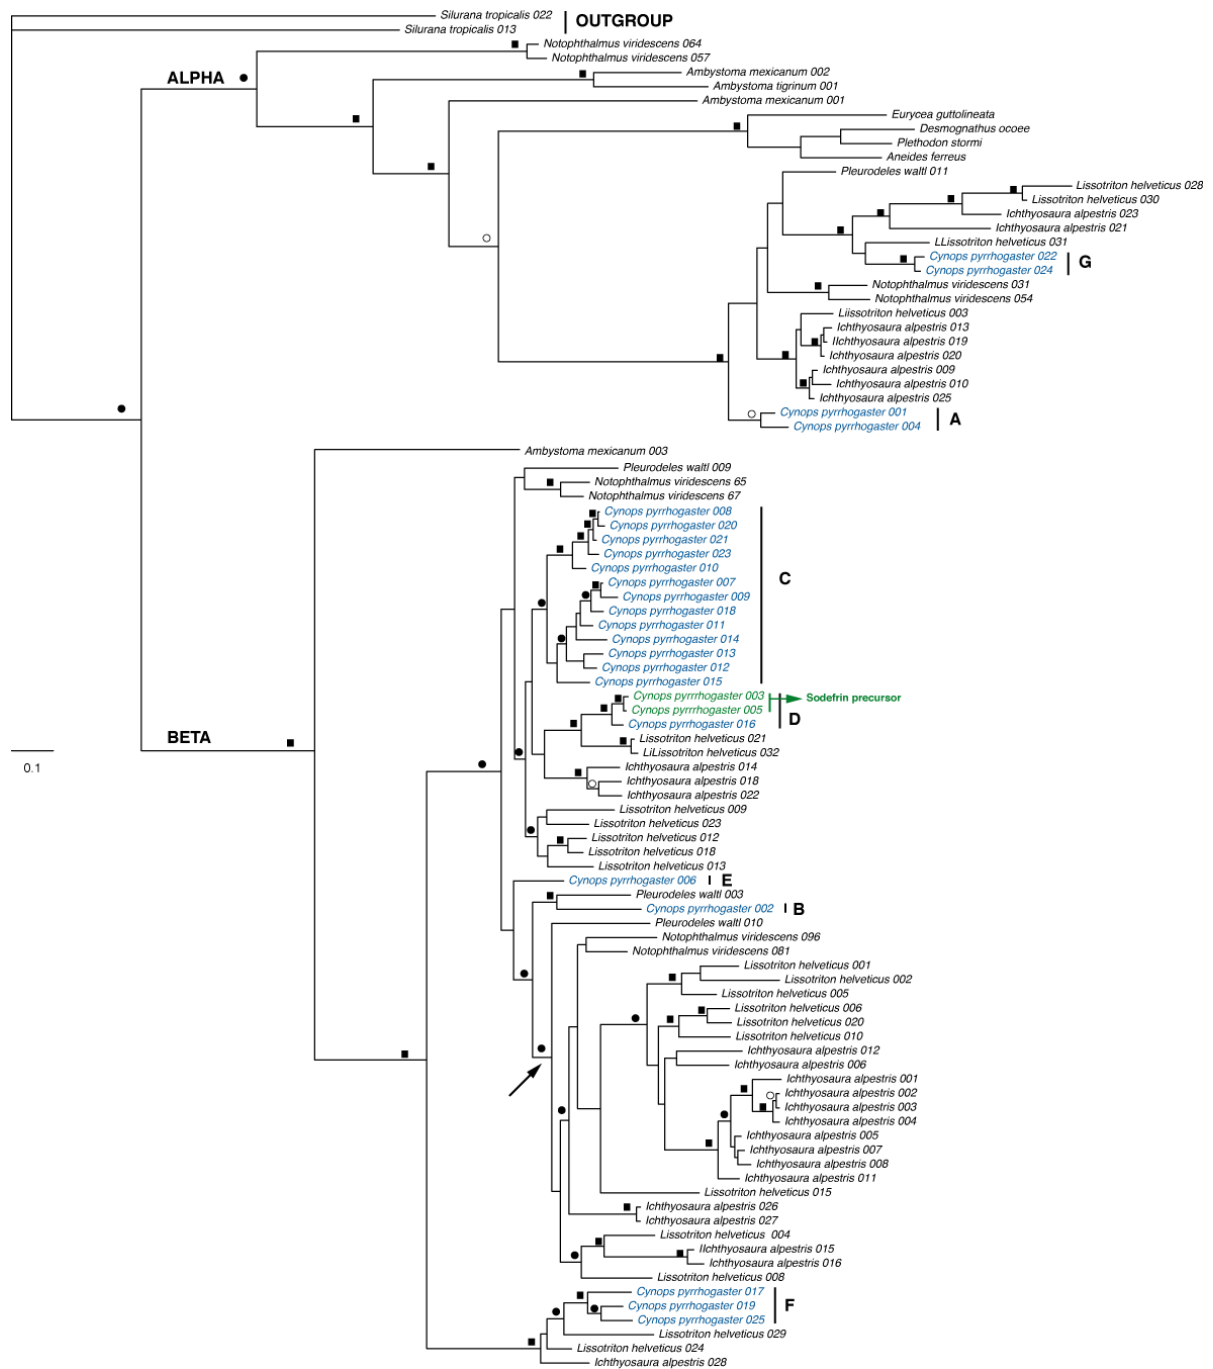

**Figure S2: Maximum Likelihood tree of SPF precursors.** Squares on the branches indicate Bayesian posterior probabilities (BPP) equal to or higher than 0.95 in combination with ML bootstrap support equal to or higher than 70. Black and white circles indicate support for BPP and ML alone, respectively.

**Table S1: primers used in this study**

| Name  | Sequence (5' – 3')            | Study      |
|-------|-------------------------------|------------|
| SPF43 | TTGTTAATAAWYATTCTGTAAAGARGCT  |            |
| SPF44 | GCCTTGTTGBCAAAAHKTCTTC        |            |
| SPF45 | ACAAYTWCTAAGCTGGHKTAGGA       |            |
| SPF46 | GTGTGTATWTGRGGTATRAACAAAGGTC  |            |
| SPF47 | CCAACAATTACTRRGMKGGAGTAGG     |            |
| SPF48 | CAACTACTAAGCTRRAGTMRGAGTGC    |            |
| SPF49 | GGRTAGGATTGCGTCAGATGTT        |            |
| SPF50 | TAGGAATGTTTCTAYKGACKACTACTRAG | [1]        |
| SPF51 | CTATTGCTAAGCTGKGGTG           |            |
| SPF52 | CAAGWYCAGACTCTGCATGCCA        |            |
| SPF53 | CACTGCAKTCCACATWCTTGTA        |            |
| SPF54 | GCTGGCACATGGGCATGT            |            |
| SPF55 | GCCCAWACASKACTAAGCACATT       |            |
| SPF56 | GACTCTGVATTHCAGGTACTTGTAGAG   |            |
| SPF57 | GCACACAGATCATACATTGTTTTTA     |            |
| SPF58 | AGCACACAGATCATACATTGTTTG      |            |
| SPF59 | GCACACAGATCATACATTGTTGG       |            |
| SPF60 | CATTCATCAGCTTCAATCTTACTATAG   |            |
| SPF61 | CATTCATCAGCTTCAATCTTACTATGT   |            |
| SPF62 | CATTCATCAGCTTCAATCTTACTG      | This study |
| SPF63 | CTATGGGGTATGAACAAAAGTCTCAAAC  |            |
| SPF64 | CTATGGGGTATGAACAAAAGGTCTCAAAG |            |
| SPF65 | ATCAAGGTACATAGATGTGGAGTT      |            |
| SPF66 | CAAGGTACATAGATGTGGAGCC        |            |
| SPF67 | AAGGTACATAGATGAGGAGTCATA      |            |

**Table S2: Edman sequences of proteins in courtship water.** Fraction numbers and gel correspond to Figure 2. The bands <10 kDa are not shown. Cysteines were not detected, as they were not alkylated prior to the sequence analysis. Small letters indicate uncertain signals.

| Fraction N° | Sequence                       | Gel        |
|-------------|--------------------------------|------------|
| 70          | LIXEQXFAVXASSxSGIfKQ           |            |
| 72          | LIXEQXFAVXASSxSGIFXQ           | Upper band |
| 73          | LIXEQXFAVHTSSxsgIFTQ<br>L LN   | Lower band |
| 75          | LLXEQXFALHTSSxSGIFT            | Lower band |
| 77          | LLXEQXFALHASSxSGIFTq<br>i d    |            |
| 78          | LLXEQXFALHASSxSGIFT            |            |
| 79          | LLXEQXFALHASSxXGIFT            |            |
| 81          | LLXEQXFALQTSSxSgIFTq           |            |
| 88          | IEXEVXSNRNGMDXSGELVTXdQxve     |            |
| 90          | IEXEVXSNRNGMDXSXELVTXdQ        |            |
| 93          | IEXEVXSNRAGMDXSGELVTXDQTVESXLT |            |
| 96          | IEXEVXSNRAGMDXSGELVTXDQ<br>T   |            |
| 100         | IEXEVXSNRA                     |            |
| 71-73       | LFWSYFPiRkXhVA                 | <10 kDa    |

**Table S3: Estimated expression of SPF precursors in the dorsal gland of *Lissotriton helveticus***, ranked on RPKM value. The number of reads analysed was 104.081.336, the number of reads that mapped on our SPF/sodefrin precursors was 7.157.215 (6,88%).

| Name        | Gene length | RPKM    | % RPKM | Unique gene reads | Total gene reads |
|-------------|-------------|---------|--------|-------------------|------------------|
| LiHe_SPF_1  | 701         | 467.280 | 33,23  | 2.318.554         | 2.344.440        |
| LiHe_SPF_2  | 724         | 425.711 | 30,27  | 2.184.949         | 2.205.960        |
| LiHe_SPF_3  | 696         | 208.004 | 14,79  | 1.036.151         | 1.036.154        |
| LiHe_SPF_4  | 738         | 190.765 | 13,57  | 1.007.590         | 1.007.623        |
| LiHe_SPF_5  | 704         | 50.664  | 3,60   | 252.932           | 255.282          |
| LiHe_SPF_6  | 691         | 15.722  | 1,12   | 77.461            | 77.757           |
| LiHe_SPF_8  | 612         | 13.041  | 0,93   | 57.121            | 57.123           |
| LiHe_SPF_9  | 705         | 8.367   | 0,59   | 41.941            | 42.217           |
| LiHe_SPF_10 | 692         | 6.195   | 0,44   | 30.673            | 30.681           |
| LiHe_SPF_12 | 671         | 4.739   | 0,34   | 17.139            | 22.761           |
| LiHe_SPF_13 | 703         | 3.215   | 0,23   | 16.171            | 16.178           |
| LiHe_SPF_21 | 678         | 2.740   | 0,19   | 9.042             | 13.294           |
| LiHe_SPF_15 | 681         | 2.591   | 0,18   | 12.627            | 12.629           |
| LiHe_SPF_18 | 683         | 2.457   | 0,17   | 9.449             | 12.012           |
| LiHe_SPF_20 | 691         | 1.536   | 0,11   | 7.553             | 7.598            |
| LiHe_SPF_23 | 675         | 1.048   | 0,07   | 4.786             | 5.063            |
| LiHe_SPF_24 | 687         | 794     | 0,06   | 3.870             | 3.902            |
| LiHe_SPF_32 | 678         | 752     | 0,05   | 2.420             | 3.648            |
| LiHe_SPF_30 | 762         | 272     | 0,02   | 751               | 1.482            |
| LiHe_SPF_29 | 687         | 174     | 0,01   | 846               | 857              |
| LiHe_SPF_28 | 761         | 84      | 0,01   | 244               | 458              |
| LiHe_SPF_31 | 760         | 18      | 0,00   | 96                | 96               |

**Table S4: Accession numbers and tissue origin of SPF precursor sequences of species used in the phylogenetic analyses.**

| Species                                  | Accession number        | Tissue               | Database     |
|------------------------------------------|-------------------------|----------------------|--------------|
| <i>Lissotriton helveticus</i> 001-006    | KJ402326-KJ402331       | male abdominal gland | NCBI         |
| <i>Lissotriton helveticus</i> 008-010    | KJ402333-KJ402335       | male abdominal gland | NCBI         |
| <i>Lissotriton helveticus</i> 012-013    | KJ402337-KJ402338       | male abdominal gland | NCBI         |
| <i>Lissotriton helveticus</i> 015        | KJ402340                | male abdominal gland | NCBI         |
| <i>Lissotriton helveticus</i> 018        | KJ402343                | male abdominal gland | NCBI         |
| <i>Lissotriton helveticus</i> 020-021    | KJ402345-KJ402346       | male abdominal gland | NCBI         |
| <i>Lissotriton helveticus</i> 023-024    | KJ402348-KJ402349       | male abdominal gland | NCBI         |
| <i>Lissotriton helveticus</i> 028-032    | KJ402353-KJ402357       | male abdominal gland | NCBI         |
| <i>Ichthyosaura alpestris</i> 001-016    | KP849562-KP849577       | male abdominal gland | NCBI         |
| <i>Ichthyosaura alpestris</i> 018-023    | KP849579-KP849584       | male abdominal gland | NCBI         |
| <i>Ichthyosaura alpestris</i> 025-028    | KP849586-KP849589       | male abdominal gland | NCBI         |
| <i>Notophthalmus viridescens</i> 031     | KP118902                | male cloacal tissue  | NCBI         |
| <i>Notophthalmus viridescens</i> 054     | KP118912                | male cloacal tissue  | NCBI         |
| <i>Notophthalmus viridescens</i> 057     | KP118898                | male cloacal tissue  | NCBI         |
| <i>Notophthalmus viridescens</i> 064-065 | KP118895-KM463868       | male cloacal tissue  | NCBI         |
| <i>Notophthalmus viridescens</i> 067     | KM463870                | male cloacal tissue  | NCBI         |
| <i>Notophthalmus viridescens</i> 081     | KP118927                | male cloacal tissue  | NCBI         |
| <i>Notophthalmus viridescens</i> 096     | KP118917                | male cloacal tissue  | NCBI         |
| <i>Cynops pyrrhogaster</i> 001-025       | KU213615-KU213639       | male abdominal gland | NCBI         |
| <i>Pleurodeles waltl</i> 003             | KM463924                | male cloacal tissue  | NCBI         |
| <i>Pleurodeles waltl</i> 009             | KM463930                | male cloacal tissue  | NCBI         |
| <i>Pleurodeles waltl</i> 010             | KM463931                | male cloacal tissue  | NCBI         |
| <i>Pleurodeles waltl</i> 011             | KM463932                | male cloacal tissue  | NCBI         |
| <i>Eurycea guttolineata</i>              | AAZ06338                | male mental gland    | NCBI         |
| <i>Aneides ferreus</i>                   | AAZ06335                | male mental gland    | NCBI         |
| <i>Desmognathus ocoee</i>                | AAZ06329                | male mental gland    | NCBI         |
| <i>Plethodon stormi</i>                  | DQ097067                | male mental gland    | NCBI         |
| <i>Ambystoma mexicanum</i> 001           | CN041146                | larval limb tissue   | NCBI         |
| <i>Ambystoma mexicanum</i> 002           | CN035733                | larval limb tissue   | NCBI         |
| <i>Ambystoma mexicanum</i> 003           | I1698676-GIB5VLK02G78TL | brain, blood, etc.   | SGP/Sal-site |
| <i>Ambystoma tigrinum</i>                | CN048649                | brain tissue         | NCBI         |
| <i>Silurana tropicalis</i> 001           | F6PQG9                  | n.a.                 | Uniprot      |
| <i>Silurana tropicalis</i> 002           | XP_002943341            | n.a.                 | NCBI         |

## References

1. Van Bocxlaer, I. et al. Side-by-side secretion of late Palaeozoic diverged courtship pheromones in an aquatic salamander. *P. Roy. Soc. B-Biol. Sci.* **282**, 20142960 (2015).
